# Supplementary material for: Crayfish hemocytes develop along the granular cell lineage
Source: PubMed Central journal article supplement (PMC8222279; doi:10.1038/s41598-021-92473-9), 2021-06-23
Supplement: 41598_2021_92473_MOESM1_ESM.pdf [file 41598_2021_92473_MOESM1_ESM.pdf]

## **Crayfish hemocytes develop along the granular cell lineage**

Fang LI<sup>1,2\*</sup>, Zaichao ZHENG<sup>1</sup>, Hongyu LI<sup>1</sup>, Rongrong FU<sup>1</sup>, Limei XU<sup>1,2</sup>, Feng YANG<sup>1,2\*</sup>

<sup>1</sup> Key Laboratory of Marine Genetic Resources, Third Institute of Oceanography, Ministry of Natural Resources, Xiamen 361005, China.

<sup>2</sup> Fujian Key Laboratory of Marine Genetic Resources, Xiamen 361005, China.

\* Corresponding authors: Third Institute of Oceanography, Ministry of Natural Resources, 184# Daxue Road, Xiamen 361005, PR China. Tel.: +86 592 2195015. E-mail addresses: [lifang@tio.org.cn](mailto:lifang@tio.org.cn) (for F. Li), [yangfeng@tio.org.cn](mailto:yangfeng@tio.org.cn) (for F. Yang)

## Supplementary materials

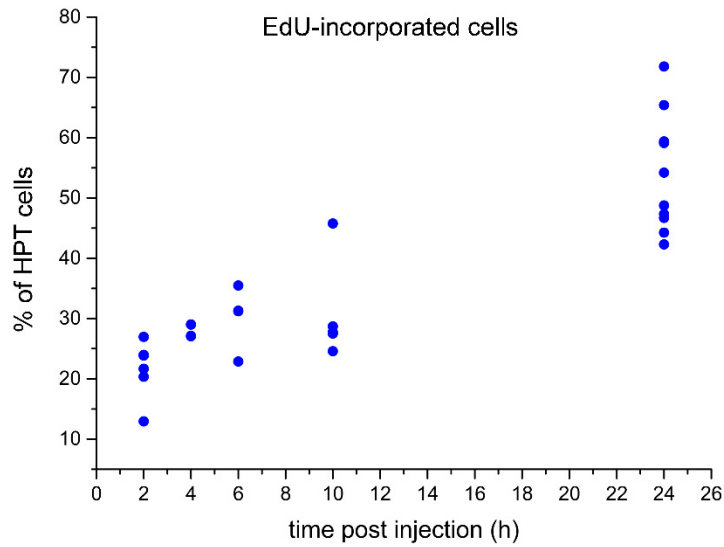

**Fig. S1 EdU incorporation in HPT cells within 24 h**

Each crayfish was injected with one dose of EdU. HPT cells were collected from each animal at different time points until 24 hpi. After fixation, cells were stained and analyzed by flow cytometry. The percentages of EdU-incorporated cells in HPT are plotted with time. More than 4 animals were analyzed at each time point.

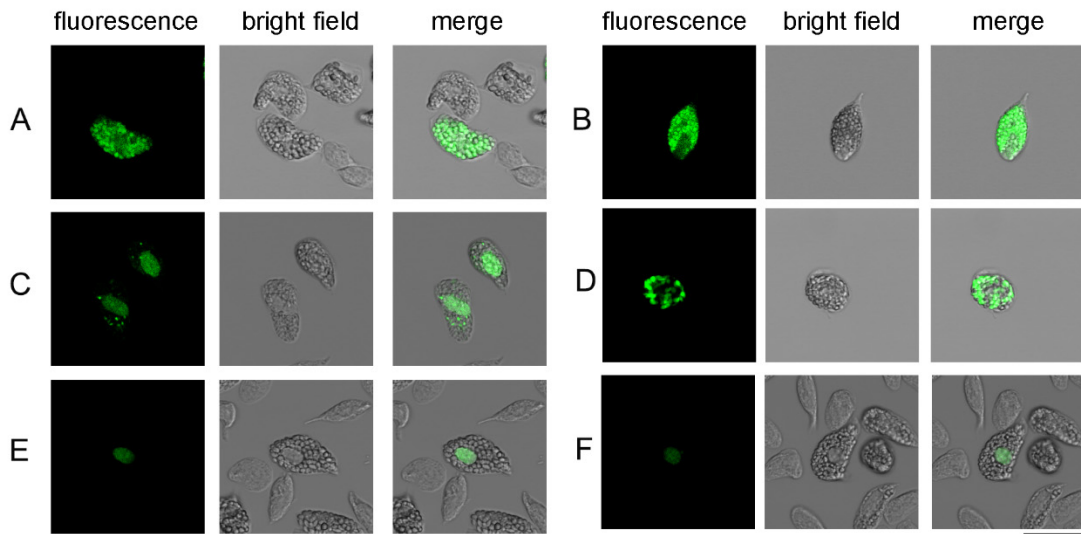

**Fig. S2 Images of allogenic GCs in the recipients**

Hemocytes were labeled with the fluorescent dye and transplanted to the recipients. The transplanted cells (green) were observed by fluorescent microscopy over time. (A, B) GCs filled with many fluorescent cytoplasmic granules at 7 dpt. (C, D) GCs contain a few fluorescent cytoplasmic granules at 42 dpt. (E and F) GCs with fluorescent signal in the nucleus only at 84 dpt. Bar, 25  $\mu$ m.

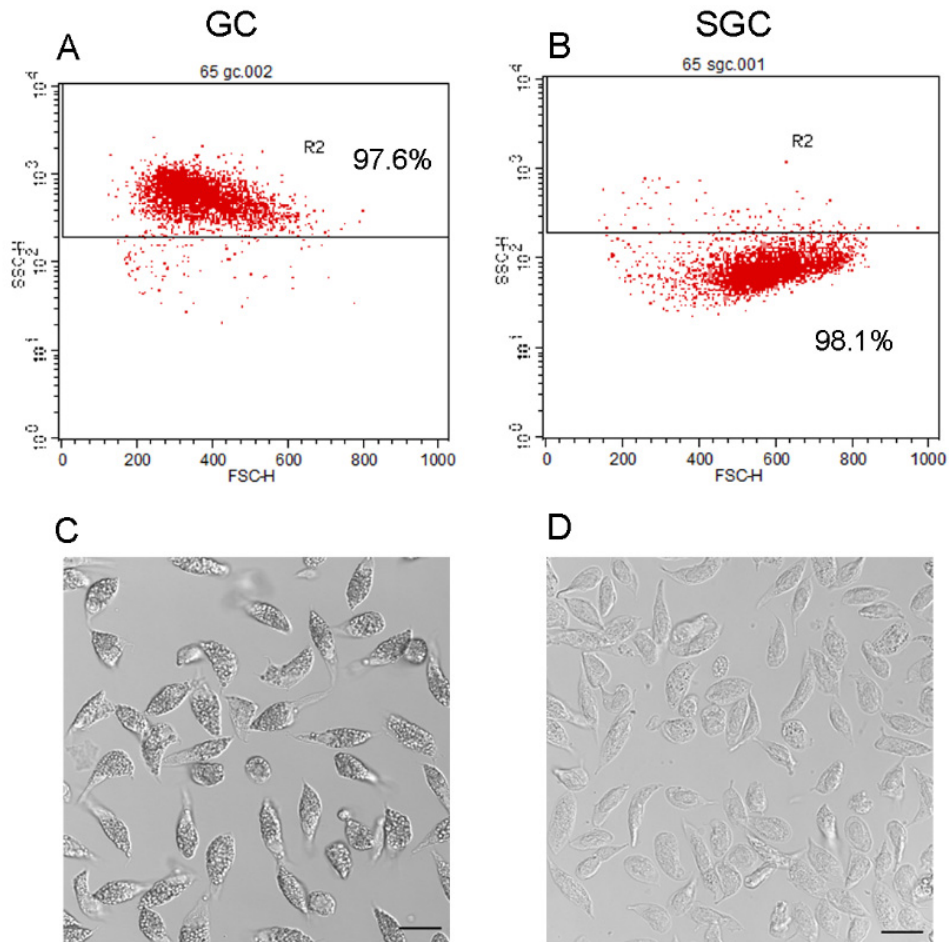

**Fig. S3 SGCs and GCs used in the transplantation experiment are of high purity**  
Hemocytes were collected from crayfish and purified by Percoll density gradient. The purity of GCs (A) and SGCs (B) was analyzed by flow cytometry with FSC-SSC scatter plots. The population in the upper region of each plot are GCs, while the population in the lower region are SGCs. The cells were further observed under a microscope: C. GCs; D. SGCs; bar 25  $\mu\text{m}$ .

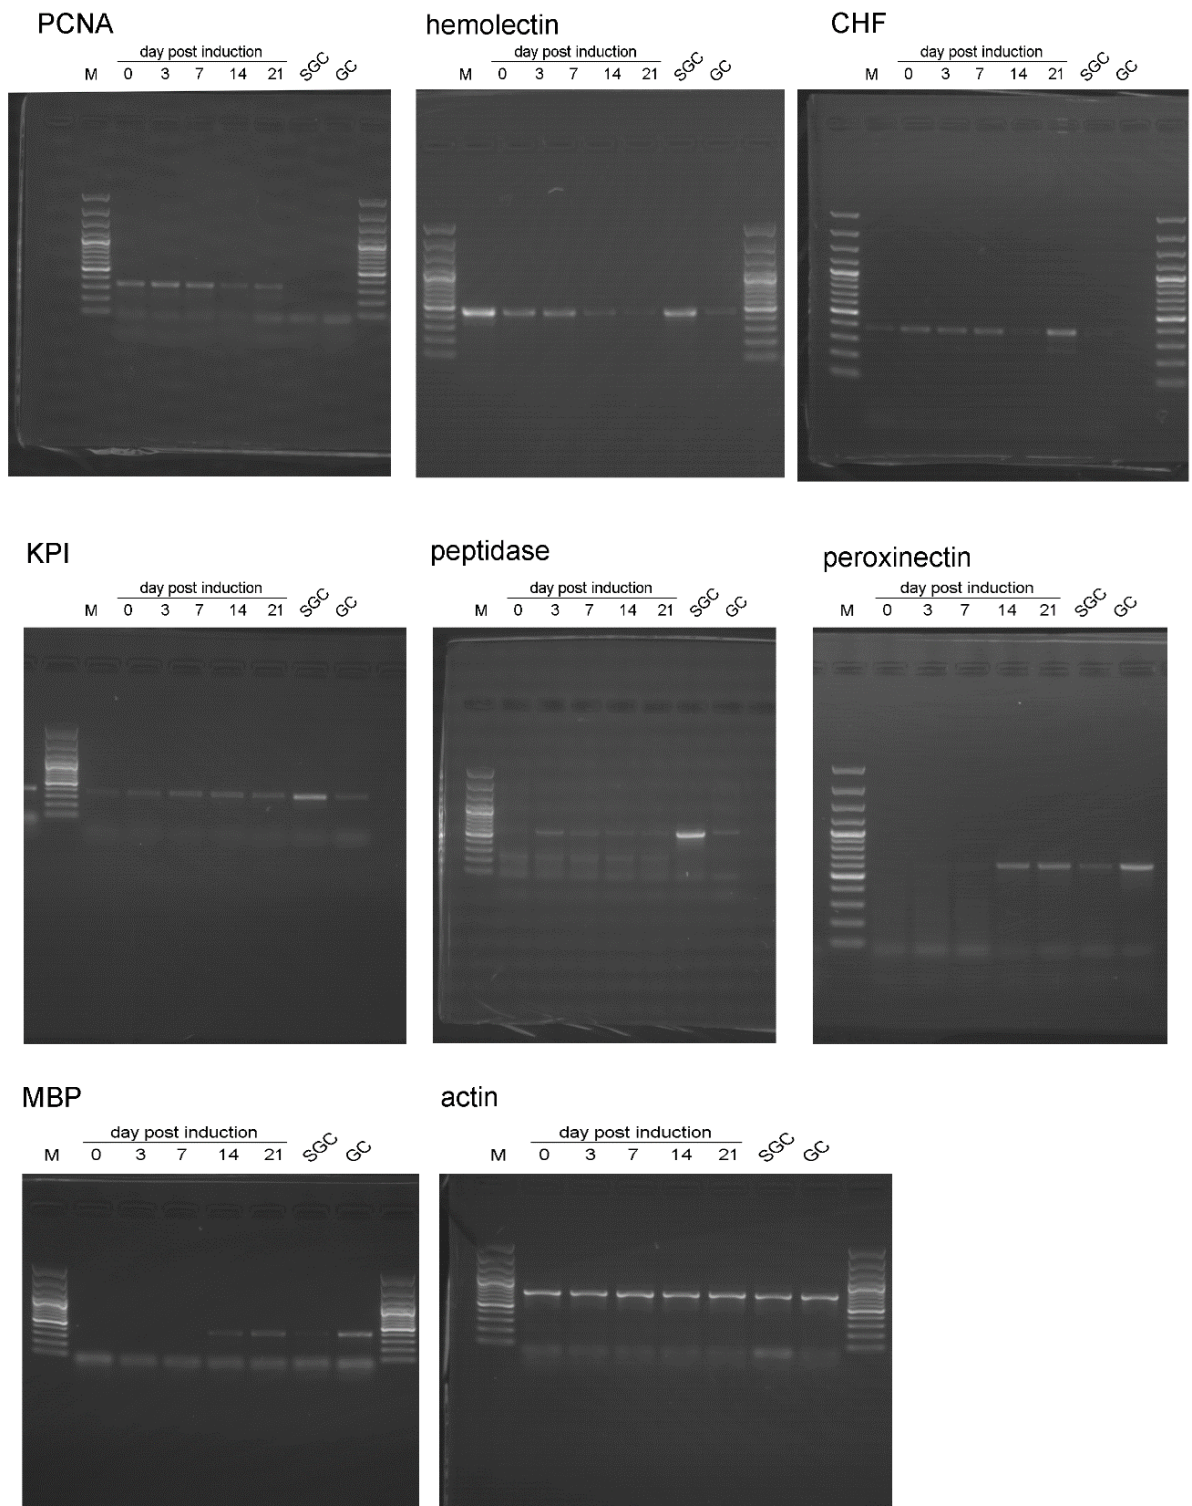

**Fig. S4 Original images of the electrophoresis results in Fig. 7 “The expression of marker genes indicates the sequential development from HPT cells to SGCs and finally to GCs”**

The differentiation of GCs from HPT cells was induced *in vitro* by the addition of crayfish muscle extract. RNA was extracted from the cells at different times post-induction, and the expression of marker genes was analyzed by RT-PCR. Purified SGCs and GCs were used as the controls. The genes analyzed were PCNA (proliferating cell nuclear antigen, HPT cell marker); hemolectin (expressed in HPT cells and SGCs); CHF (crustacean hematopoietic factor, expressed in HPT cells and SGCs); KPI (SGC specific Kazal proteinase inhibitor, SGC marker); peptidase (SGC marker); peroxinectin (GC marker); and MBP (mannose binding protein, GC marker).  $\beta$ -Actin was used as an internal control.

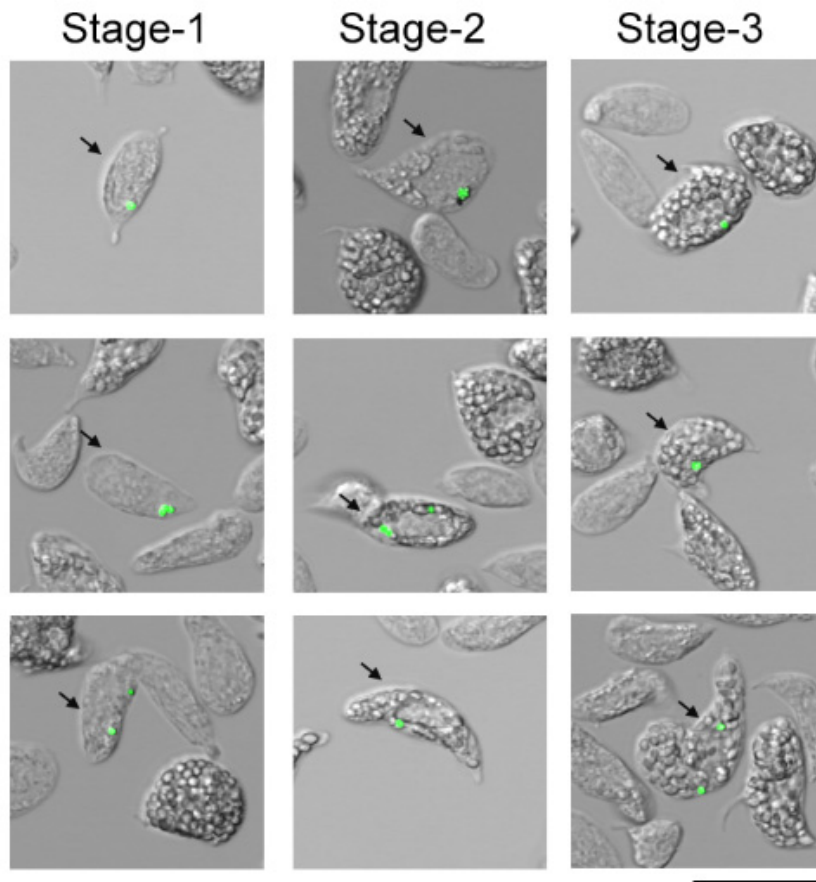

**Fig. S5 Cells belonging to different developmental stages are capable of phagocytosis**

Fluorescent microspheres (green) were injected into crayfish, hemocytes were collected at 4 hpi, and observed by fluorescent microscopy. Images of phagocytic cells (indicated with arrows) belong to three different stages are shown. Bar, 25  $\mu\text{m}$ .

**Table S1. Primers used in this study**

| Gene           | GenBank no. | Primer           | Primer sequence (5'-3') |
|----------------|-------------|------------------|-------------------------|
| PCNA           | MK252700    | PCNA F2          | TAATGGGCATGGATCTTACC    |
|                |             | PCNA R2          | CCAATGTCACCAGCAGCAG     |
| peroxinectin   | MW358640    | peroxinectin-F   | ACGAGCAGCCTATCTTGACC    |
|                |             | peroxinectin-R   | AGCTGTTGTAGGTGGCGATG    |
| MBP            | MW358645    | MBP-F            | CAACAAGCTAATGGTTACTGC   |
|                |             | MBP-R            | TAAGTCTGAGTGTTGCGGTA    |
| CHF            | MW358641    | CHF-F            | TAACATAATGGCTCAGGTCTC   |
|                |             | CHF-R            | AGATGTAATCGCAGTAAGTGTC  |
| peptidase      | MW358646    | peptidase-F      | AGTCCAGACGTGTCGAGCAT    |
|                |             | peptidase-R      | CCAGCGAGTCCAGAGTAAGAG   |
| KPI            | MW358644    | KPI-F            | TGTGGAAGGTACTGTGGGTC    |
|                |             | KPI-R            | CTGGAGATGGGTTCTTGATT    |
| hemolectin     | MW358643    | hemolectin-F     | CACTACCAAACGAACATGC     |
|                |             | hemolectin-R     | TTGGGAACCCCTACTCATAC    |
| $\beta$ -Actin | AY430093    | $\beta$ -actin F | GACATGGAGAAGATCTGG      |
|                |             | $\beta$ -actin R | GCAGTGATTTCCCTTCTGC     |



**Table S2. GCs are the major senescent cells in circulation**

| crayfish       | male/female | body weight (g) | hemocyte mortality <sup>a</sup> | the number of dead cells observed <sup>b</sup> | dead cells with intact structure <sup>b</sup> | dead GCs <sup>b</sup> | dead GCs/ dead cells with intact structure |
|----------------|-------------|-----------------|---------------------------------|------------------------------------------------|-----------------------------------------------|-----------------------|--------------------------------------------|
| 1              | male        | 28              | 0.9%                            | 98                                             | 56                                            | 53                    | 94.6%                                      |
| 2              | male        | 35              | 1.8%                            | 154                                            | 82                                            | 78                    | 95.1%                                      |
| 3              | male        | 37              | 1.5%                            | 175                                            | 94                                            | 87                    | 92.6%                                      |
| 4              | male        | 41              | 0.4%                            | 158                                            | 71                                            | 63                    | 88.7%                                      |
| 5              | male        | 41              | 0.9%                            | 165                                            | 102                                           | 91                    | 89.2%                                      |
| 6              | male        | 42              | 1.0%                            | 138                                            | 110                                           | 102                   | 92.7%                                      |
| 7              | male        | 42              | 0.9%                            | 130                                            | 90                                            | 85                    | 94.4%                                      |
| 8              | male        | 43              | 0.6%                            | 143                                            | 70                                            | 63                    | 90.0%                                      |
| 9              | male        | 46              | 1.3%                            | 132                                            | 97                                            | 93                    | 95.9%                                      |
| 10             | male        | 57              | 0.6%                            | 180                                            | 82                                            | 77                    | 93.9%                                      |
| 11             | female      | 34              | 0.7%                            | 202                                            | 108                                           | 99                    | 91.7%                                      |
| 12             | female      | 37              | 1.2%                            | 136                                            | 104                                           | 103                   | 99.0%                                      |
| 13             | female      | 37              | 0.6%                            | 125                                            | 95                                            | 92                    | 96.8%                                      |
| 14             | female      | 40              | 0.8%                            | 146                                            | 71                                            | 66                    | 93.0%                                      |
| 15             | female      | 42              | 0.8%                            | 136                                            | 93                                            | 86                    | 92.5%                                      |
| 16             | female      | 44              | 1.0%                            | 164                                            | 108                                           | 104                   | 96.3%                                      |
| 17             | female      | 46              | 1.0%                            | 139                                            | 104                                           | 102                   | 98.1%                                      |
| 18             | female      | 50              | 1.3%                            | 165                                            | 67                                            | 66                    | 98.5%                                      |
| 19             | female      | 50              | 0.7%                            | 138                                            | 80                                            | 74                    | 92.5%                                      |
| 20             | female      | 60              | 1.2%                            | 208                                            | 142                                           | 136                   | 95.8%                                      |
| <b>Average</b> |             |                 | <b>1.0%</b>                     |                                                |                                               |                       | <b>94.1%</b>                               |
| <b>SD</b>      |             |                 | <b>0.3%</b>                     |                                                |                                               |                       | <b>2.9%</b>                                |

<sup>a</sup>. Flow cytometry data; <sup>b</sup>. data from fluorescence microscopy analysis

**Table S3. Transplanted GCs do not convert into SGCs**

| <b>Day post transplantation</b> |            | <b>1</b> | <b>7</b> | <b>28</b> | <b>56</b> |
|---------------------------------|------------|----------|----------|-----------|-----------|
| <b>Percentage of</b>            | Crayfish 1 | 96.5%    | 96.2%    | 100.0%    | 100.0%    |
| <b>GCs in the</b>               | Crayfish 2 | 100.0%   | 90.0%    | 100.0%    | 100.0%    |
| <b>allogenic population</b>     | Crayfish 3 | 100.0%   | 96.2%    | 100.0%    | 100.0%    |
